# Supplementary material for: Case report: Refractory cardiac arrest supported with veno-arterial-venous extracorporeal membrane oxygenation and left-ventricular Impella CP®–Physiological insights and pitfalls of ECMELLA
Source: PubMed Central journal article supplement (PMC9674118; doi:10.3389/fcvm.2022.1045601), 2022-11-04
Supplement: Data_Sheet_1.pdf [file Data_Sheet_1.pdf]

## Supplementary Material

**Supplementary Figure 1.** Laboratory values during hospital stay of the patient

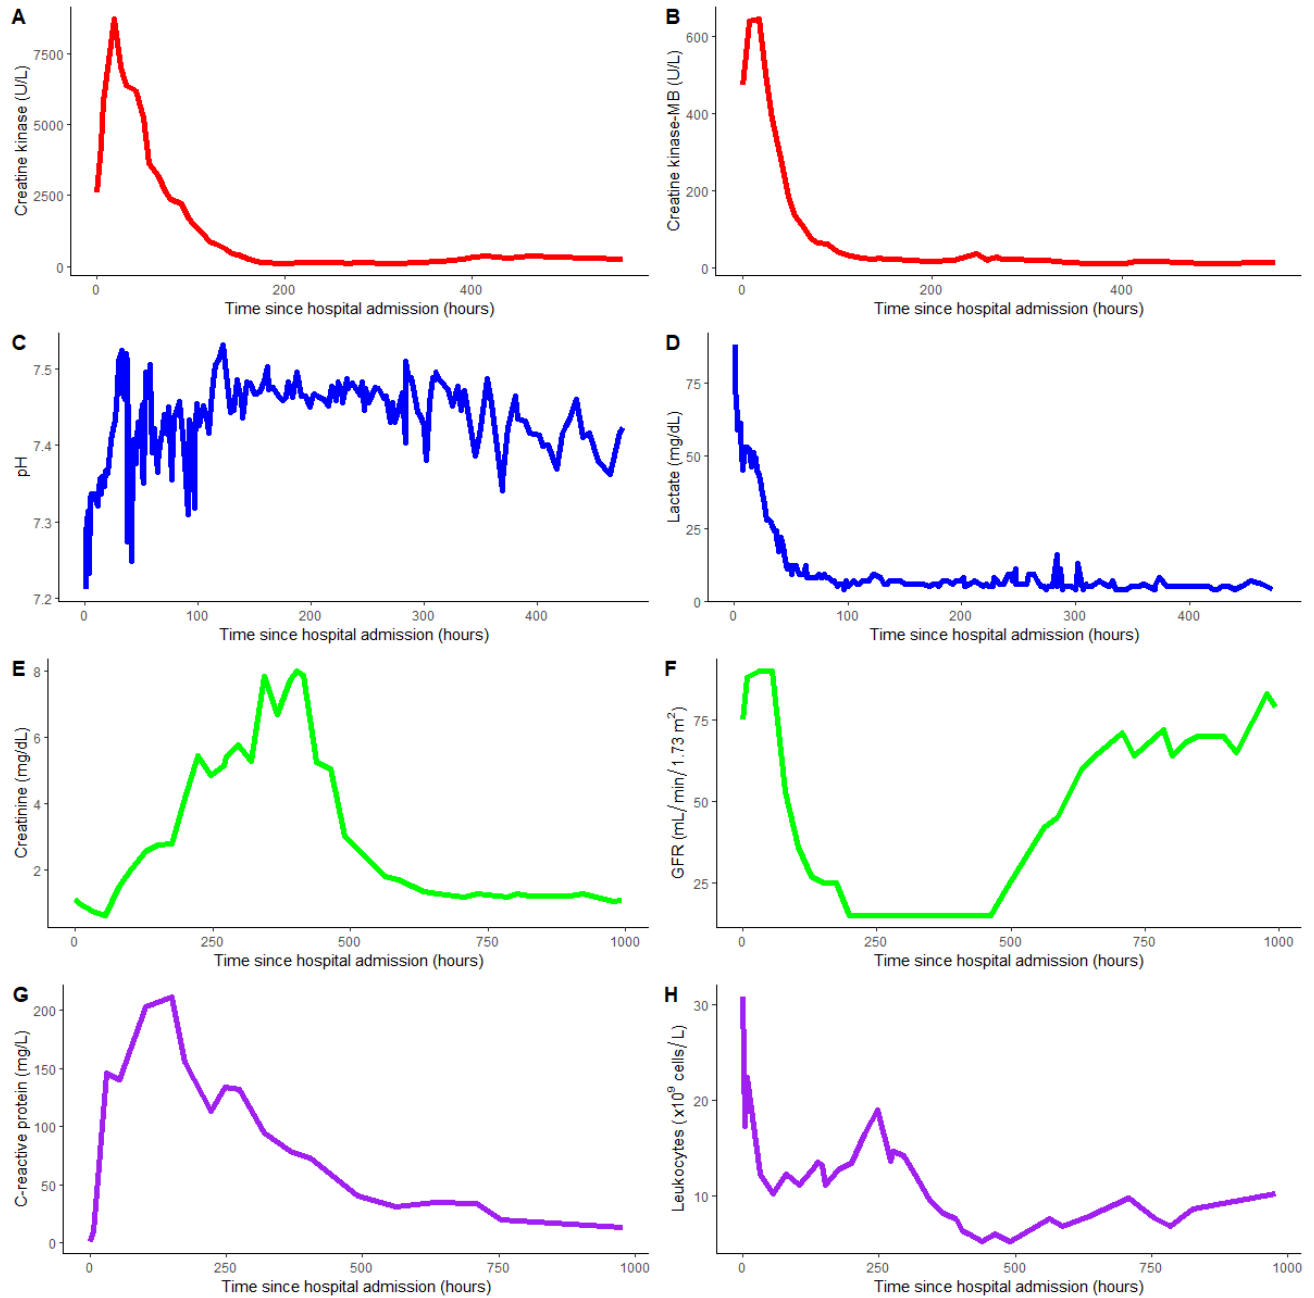

Abbreviations: glomerular filtration rate (GFR)

**Supplementary Figure 2.** Pressure-volume loops of the left ventricle during (concomitant) treatment with percutaneous mechanical circulatory support devices

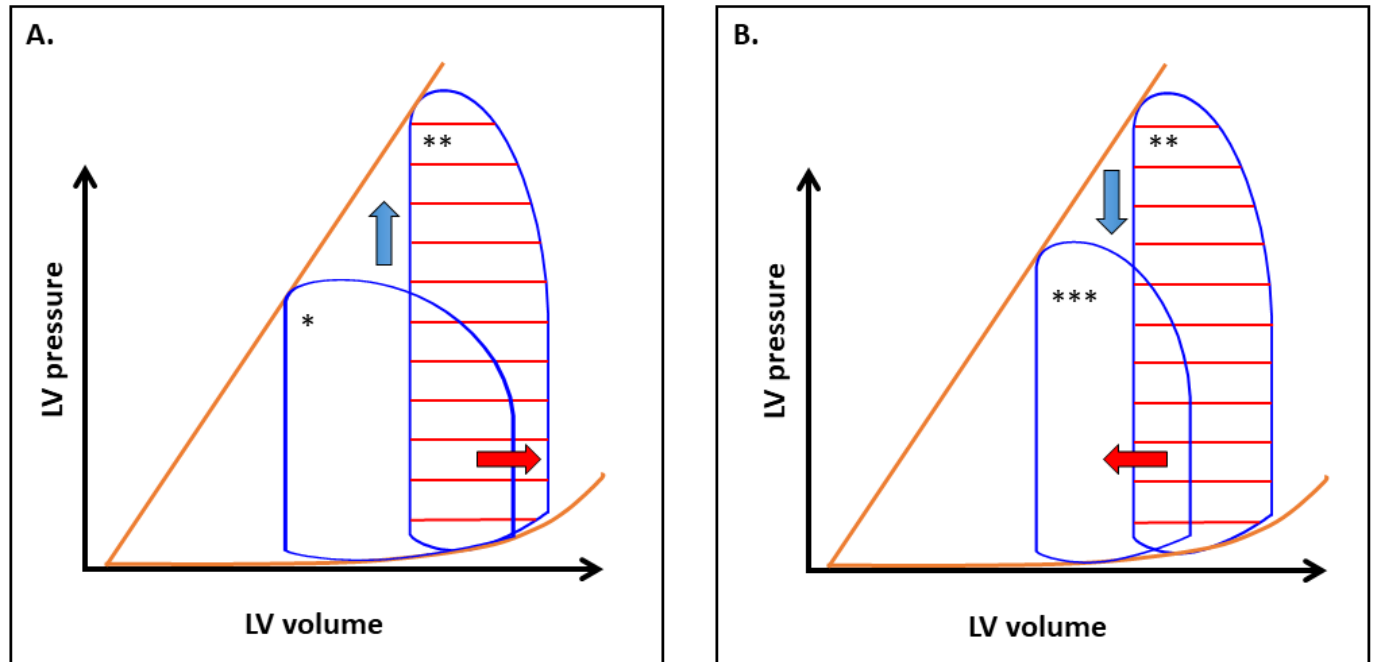

A. Pressure–volume loops during normal cardiac activity as reference (\*) and after initiation of VA-ECMO support (\*\*). The blue arrow indicates an increase in wall stress and afterload by VA-ECMO; the shift of the pressure-volume loop to the right (red arrow) indicates increased energy demand.

B. Pressure–volume loop after insertion of Impella® micro-axial pump concomitant to VA-ECMO (\*\*\*). The red arrow indicates left-ventricular unloading (i.e., reduced energy demand). The blue arrow indicates reduced afterload.

Abbreviations: left ventricle (LV); veno-arterial extracorporeal membrane oxygenation (VA-ECMO).
